# Supplementary material
Source: MDPI journal article supplement (https://www.mdpi.com/2073-4433/9/2/78)
Supplement: s1 [file s1]

# Spatiotemporal Distribution of Satellite-Retrieved Ground-Level PM<sub>2.5</sub> and Near Real-Time Daily Retrieval Algorithm Development in Sichuan Basin, China

Chao Gao, Xuelei Zhang, Wenyong Wang, Aijun Xiu, Daniel Q. Tong and Weiwei Chen

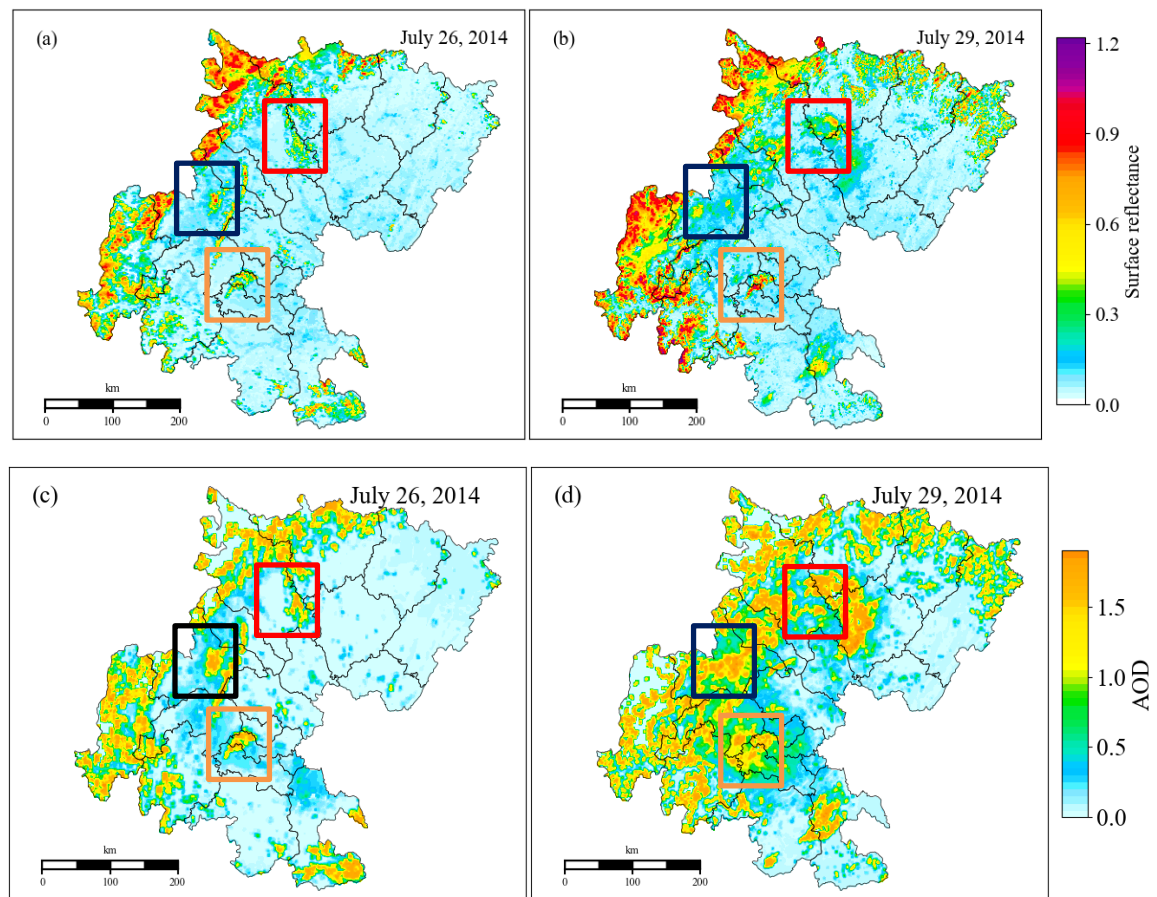

**Figure S1.** A comparison between two days (26 July 2014 and 29 July 2014) with similar surface reflectance (around 0.4), but with different MODIS retrieved AODs.
